# Supplementary material for: Immunosuppressive Effects of A‐Type Procyanidin Oligomers from Cinnamomum tamala
Source: Hindawi journal article supplement (doi:10.1155/2014/365258), 2014-01-01
Supplement: f1 [file 365258.f1.pdf]

## Supporting information

### Spectral data:

Table 1. The  $^1\text{H}$  NMR (400MHz,  $\text{CD}_3\text{OD}$ ) and  $^{13}\text{C}$  NMR data of **1**

| CTB-1<br>No | Upper unit          |                       | Middle unit         |                     | Terminal unit       |                       |
|-------------|---------------------|-----------------------|---------------------|---------------------|---------------------|-----------------------|
|             | $\delta_{\text{C}}$ | $\delta_{\text{H}}$   | $\delta_{\text{C}}$ | $\delta_{\text{H}}$ | $\delta_{\text{C}}$ | $\delta_{\text{H}}$   |
| 2           | 100                 |                       | 78.9                | 5.73 (br. s)        | 80.3                | 4.41 (br. s)          |
| 3           | 67.2                | 3.31 (d, 3.5 Hz)      | 72.6                | 4.15 (br. s)        | 67.5                | 3.89 (br. s)          |
| 4           | 28.8                | 4.17 (d, 3.4 Hz)      | 38.3                | 4.58 (br. s)        | 29.8                | 2.79-2.94 (m)         |
| 5           | 156.7               |                       | 155.8               |                     | 155.8               |                       |
| 6           | 98.3                | 5.99 (d, 2.2 Hz)      | 96.1                | 5.83 (s)            | 96.5                | 6.13 (s)              |
| 7           | 157.8               |                       | 151.1               |                     | 156                 |                       |
| 8           | 96.5                | 6.04 (d, 2.2 Hz)      | 106.4               |                     | 108.8               |                       |
| 9           | 154.1               |                       | 151.8               |                     | 155.5               |                       |
| 10          | 104.9               |                       | 106.7               |                     | 99.9                |                       |
| 1'          | 131.8               |                       | 132.4               |                     | 133.1               |                       |
| 2'          | 116.1               | 7.05 (d, 1.7 Hz)      | 116.7               | 7.34 (d, 1.7 Hz)    | 116.7               | 6.87 (d, 1.7 Hz)      |
| 3'          | 145.9               |                       | 145.5               |                     | 146.6               |                       |
| 4'          | 145.3               |                       | 145.7               |                     | 146.3               |                       |
| 5'          | 115.7               | 6.83-6.88 (d)         | 116                 | 6.83-6.88 (d)       | 115.7               | 6.83-6.88 (d)         |
| 6'          | 119.8               | 6.76-6.79 (d, 1.7 Hz) | 121.3               | 7.21 (d, 1.7 Hz)    | 119.4               | 6.76-6.79 (d, 1.7 Hz) |

Table 2, The  $^1\text{H}$  NMR (400MHz,  $\text{CD}_3\text{OD}$ ) and  $^{13}\text{C}$  NMR data of **2**

| CTD-1<br>No | upper unit          |                     | middle unit         |                     | terminal unit       |                                                   |
|-------------|---------------------|---------------------|---------------------|---------------------|---------------------|---------------------------------------------------|
|             | $\delta_{\text{C}}$ | $\delta_{\text{H}}$ | $\delta_{\text{C}}$ | $\delta_{\text{H}}$ | $\delta_{\text{C}}$ | $\delta_{\text{H}}$                               |
| 2           | 100.1               |                     | 78.6                | 5.50 (br. s)        | 83.3                | 3.94 (d, 9.1 Hz)                                  |
| 3           | 67.2                | 3.45 (d, 3.5 Hz)    | 72.5                | 4.05 (br. s)        | 70.1                | 3.67 (m)                                          |
| 4           | 28.9                | 3.98 (d, 3.5 Hz)    | 39.7                | 4.52 (br. s)        | 30.7                | 3.04 (dd, 16.2, 6.2Hz)<br>2.41 (dd, 16.2, 10.1Hz) |
| 5           | 157.8               |                     | 156.7               |                     | 155.6               |                                                   |
| 6           | 98.4                | 5.93 (d, 2.2 Hz)    | 96.1                | 5.83 (br. s)        | 96.5                | 6.10 (br. s)                                      |
| 7           | 157.8               |                     | 151.1               |                     | 155.8               |                                                   |
| 8           | 96.5                | 6.00 (d, 2.2 Hz)    | 106.3               |                     | 108.8               |                                                   |

|    |       |                        |       |                        |       |                        |
|----|-------|------------------------|-------|------------------------|-------|------------------------|
| 9  | 154.2 |                        | 151.7 |                        | 155.4 |                        |
| 10 | 105.0 |                        | 106.6 |                        | 101.8 |                        |
| 1' | 132.4 |                        | 131.5 |                        | 132.7 |                        |
| 2' | 115.8 | 7.08 (d, 2.0 Hz)       | 115.9 | 7.23 (d, 1.7 Hz)       | 115.7 | 6.75 (d, 2.0 Hz)       |
| 3' | 145.8 |                        | 145.9 |                        | 146.0 |                        |
| 4' | 146.7 |                        | 146.3 |                        | 145.5 |                        |
| 5' | 116.5 | 6.84 (d, 8.3 Hz)       | 116.1 | 6.83 (d, 8.1 Hz)       | 116.2 | 6.76 (d, 8.0 Hz)       |
| 6' | 120.1 | 6.95 (dd, 8.3, 2.0 Hz) | 121.1 | 7.08 (dd, 8.1, 1.7 Hz) | 120.0 | 6.66 (dd, 8.0, 2.0 Hz) |

Table 3. The  $^1\text{H}$  NMR (400MHz,  $\text{CD}_3\text{OD}$ ) and  $^{13}\text{C}$  NMR data of **3**

| PA-1 | upper unit          |                               | middle unit         |                               | terminal unit       |                               | extent unit         |                               |
|------|---------------------|-------------------------------|---------------------|-------------------------------|---------------------|-------------------------------|---------------------|-------------------------------|
| No   | $\delta_{\text{C}}$ | $\delta_{\text{H}}$ (m, J/Hz) | $\delta_{\text{C}}$ | $\delta_{\text{H}}$ (m, J/Hz) | $\delta_{\text{C}}$ | $\delta_{\text{H}}$ (m, J/Hz) | $\delta_{\text{C}}$ | $\delta_{\text{H}}$ (m, J/Hz) |
| 2    | 100.2               |                               | 78.7                | 5.70 (br. s)                  | 80.2                | 4.10 (br. s)                  | 76.6                | 4.77 (br. s)                  |
| 3    | 66.8                | 3.30 (d, 3.8)                 | 72.4                | 3.96 (m)                      | 67.4                | 3.65 (m)                      | 71.4                | 4.13 (br. s)                  |
| 4    | 28.9                | 4.26 (d, 3.6)                 | 38.4                | 4.45 (br. s)                  | 29.7                | 2.76-2.87 (m)                 | 37.7                | 4.40 (br. s)                  |
| 5    | 156.7               |                               | 154.3               |                               | 156.1               |                               | 157.9               |                               |
| 6    | 98.3                | 6.00 (d, 2.0)                 | 107.8               |                               | 96.7                | 6.10 (s)                      | 96.2                | 5.95 (d, 2.0)                 |
| 7    | 157.9               |                               | 148.4               |                               | 155.5               |                               | 159.5               |                               |
| 8    | 96.6                | 6.08 (d, 2.0)                 | 106.9               |                               | 108.8               |                               | 96.6                | 5.90 (d, 2.0)                 |
| 9    | 154.3               |                               | 150.3               |                               | 155.6               |                               | 159.3               |                               |
| 10   | 104.9               |                               | 107.2               |                               | 99.9                |                               | 99.4                |                               |
| 1'   | 132.3               |                               | 131.7               |                               | 132.8               |                               | 131.7               |                               |
| 2'   | 115.8               | 7.17 (d, 1.7)                 | 116.8               | 7.33 (d, 1.7)                 | 115.5               | 6.67 (d, 1.5)                 | 116.8               | 7.13 (br. s)                  |
| 3'   | 145.6               |                               | 145.9               |                               | 145.8               |                               | 146.3               |                               |
| 4'   | 146.8               |                               | 146.3               |                               | 145.4               |                               | 146.3               |                               |
| 5'   | 116.1               | 6.90-6.95                     | 116.1               | 6.85 (d, 8.2)                 | 115.9               | 6.74 (d, 8.0)                 | 116                 | 6.90-6.95                     |
| 6'   | 119.9               | 6.90-6.95                     | 121.4               | 7.23 (dd, 8.2, 2.0)           | 119.3               | 6.30 (br. d, 8.2)             | 120.7               | 6.95 (dd, 8.7, 1.8)           |

**procyanidin B-2 (4) :**

$^1\text{H}$  NMR ( $\text{CD}_3\text{OD}$ , 400 MHz):  $\delta_{\text{H}}$  2.78 - 2.82 [1H, br. d,  $J = 16.7$  Hz, H-4 $\alpha$  (F)], 2.91 - 2.94 [1H, br. d,  $J = 15.2$  Hz, H-4 $\beta$  (F)], 3.90 [1H, br. s, H-3 (C)], 4.27 [1H, br. s, H-3 (F)], 4.62 [1H, br. s, H-4 (C)], 5.04 [1H, s, H-2 (C)], 5.89 - 6.15 [3H, H-6 (A), H-8

(A), H-6 (D)], 6.89 - 7.12 [6H, H-2 (B,E), H-5 (B,E), H-6 (B,E)].  $^{13}\text{C}$  NMR ( $\text{CD}_3\text{OD}$ , 100 MHz): C-ring  $\delta_{\text{C}}$  35.7 (C-4), 72.1 (C-3), 78.3 (C-2); F-ring  $\delta_{\text{C}}$  28.3 (C-4), 65.6 (C-3), 75.7 (C-2); A-ring  $\delta_{\text{C}}$  155.1 (C-5), 99.1 (C-6), 156.9 (C-7), 94.7 (C-8), 156.4 (C-9), 99.9 (C-10); D-ring  $\delta_{\text{C}}$  155.1 (C-5), 99.1 (C-6), 156.9 (C-7), 105.9 (C-8), 153.1 (C-9), 101.4 (C-10); B, E-rings  $\delta_{\text{C}}$  113.9 ( $\times 2$ ), 114.5 ( $\times 2$ ), 117.8 ( $\times 2$ ), 130.7, 131.2, 144.2 ( $\times 2$ ), 144.5 ( $\times 2$ ).

**procyanidin C-1 (5)**

$^1\text{H}$ -NMR ( $\text{CD}_3\text{OD}$ , 400MHz):  $\delta_{\text{H}}$  2.80-2.97 (2H, m), 4.02(2H, brs), 4.33(1H, brs) , 4.72(2H, brs), 4.99(1H, brs), 5.07 (1H, brs), 5.22(1H, brs), 5.93-6.00 (4H, m), 6.70-7.32 (9H, m)

$^{13}\text{C}$ -NMR( $\text{CD}_3\text{OD}$ , 100MHz):  $\delta_{\text{C}}$  29.8, 37.3, 37.4, 66.8, 72.9, 73.4, 77.1 ( $\times 2$ ), 79.7, 96.2, 96.6, 97.6, 100.6, 101.4, 107.2, 107.6, 115.1-116.1, 119.1-119.3, 132.1, 132.5, 132.7, 145.5-146.0, 156.6-158.2.

## Figures

Fig.1 Common structure and sign of procyanidin oligomers.

Fig.2 RP-HPLC chromatographic profile of procyanidin oligomers compounds 1- 5 and CT-F, detected at 280nm. 1: PA-1, 2: PB-2, 3:CTD-1, 4: CTB-1, 5: PC-1, 6-7: procyanidin trimers. The HPLC purity of compounds **1**- 5 are more than 95%.

Fig. 3 Identification of the procyanidin oligomers in CT-F by LC-MS analysis.

The analyses were performed to identify the type of procyanidin oligomers in CT-F using a Shimadzu LC-20ADXR and a Thermo LCQ Fleet (Thermo Scientific) instrument. The outlet of the HPLC system was split (3:1) into the ESI-MS interface of the mass analyzer in the negative ion mode. ESI-MS analyses were performed under the following optimized conditions: source voltage, 4.5 kV; capillary voltage, -37 V; capillary temperature, 320 °C; sheath gas (N<sub>2</sub>) flow; 40 arbitrary units (arb); and auxiliary gas (N<sub>2</sub>) flow, 10 arb. Full-scan MS spectra (range, *m/z* 200 to 2000) were initially recorded during the chromatographic run.

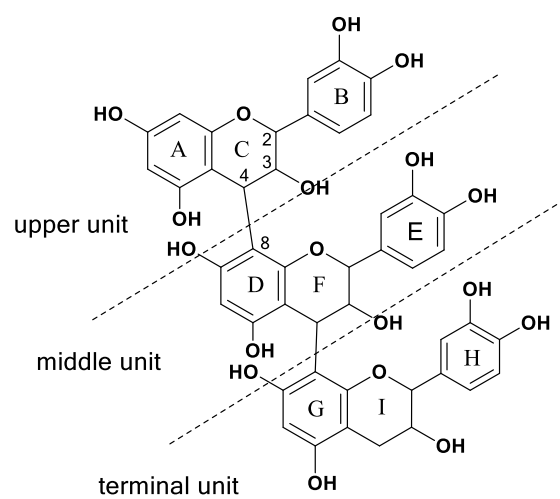

Fig. 1

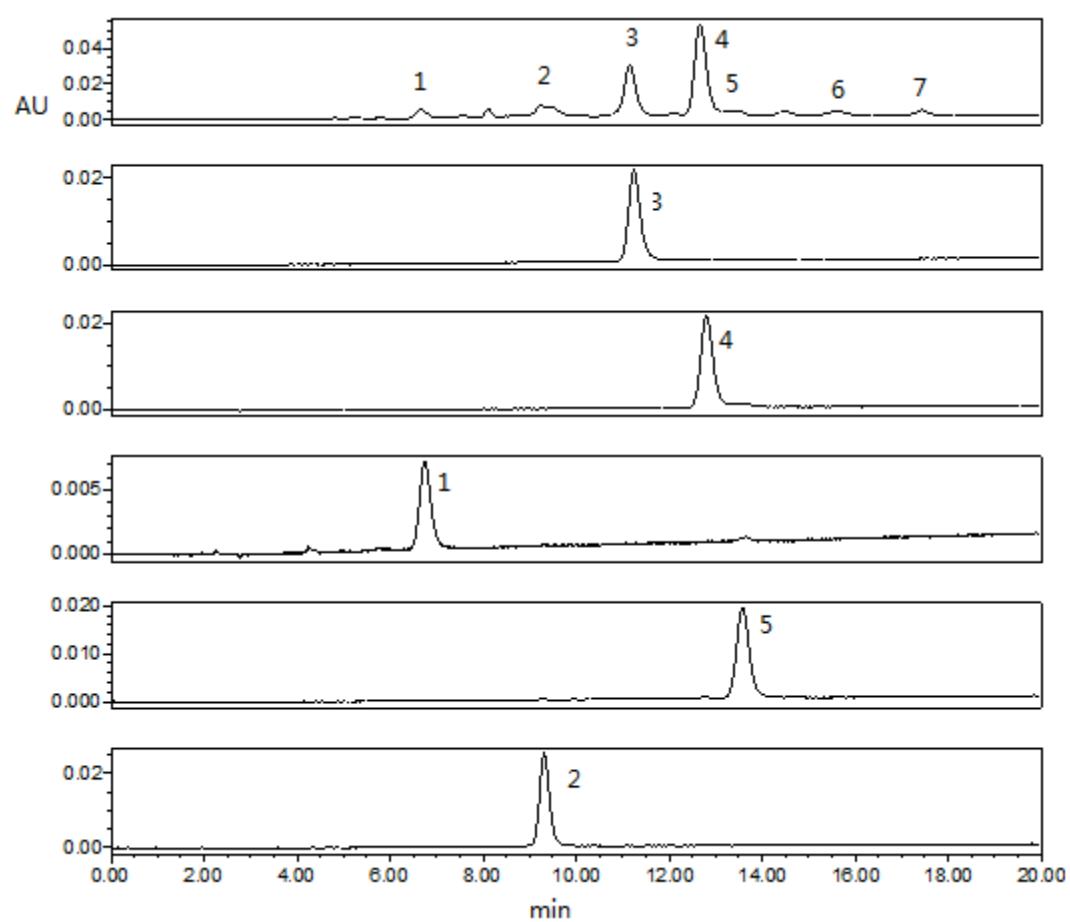

Fig. 2

RT: 0.00 - 35.00

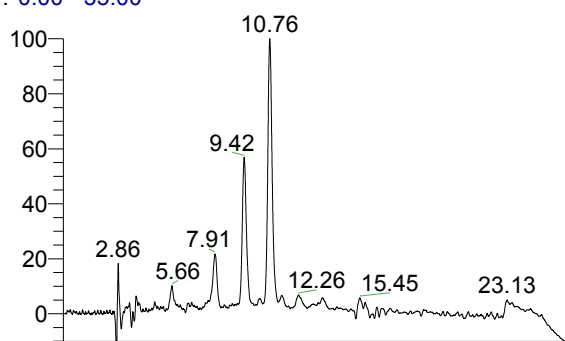

NL: 7.32E4

Total Scan PDA CGDF

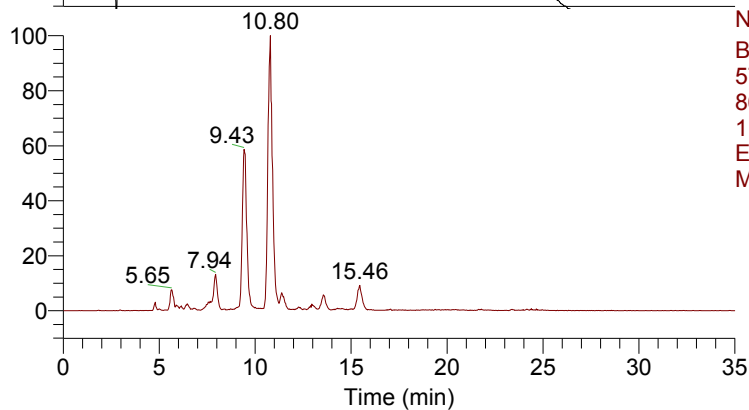

NL: 5.36E4

Base Peak m/z=  
576.50-577.50+862.50-863.50+  
864.50-865.50+  
1150.50-1151.50 F: ITMS - c  
ESI Full ms [100.00-2000.00]  
MS CGDF

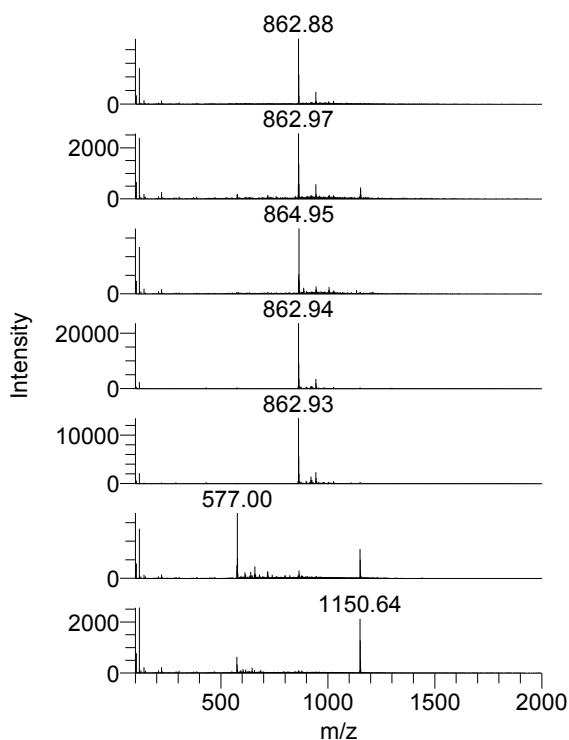

NL: 4.80E3

CGDF#918 RT: 15.43 AV: 1 F: ITMS - c ESI Full  
ms [100.00-2000.00]

NL: 2.55E3

CGDF#804 RT: 13.52 AV: 1 F: ITMS - c ESI Full  
ms [100.00-2000.00]

NL: 3.50E3

CGDF#676 RT: 11.39 AV: 1 F: ITMS - c ESI Full  
ms [100.00-2000.00]

NL: 2.35E4

CGDF#609-646 RT: 10.36-10.91 AV: 19 F: ITMS - c  
ESI Full ms [100.00-2000.00]

NL: 1.34E4

CGDF#531-572 RT: 9.11-9.73 AV: 21 F: ITMS - c  
ESI Full ms [100.00-2000.00]

NL: 3.51E3

CGDF#442-473 RT: 7.62-8.10 AV: 16 F: ITMS - c  
ESI Full ms [100.00-2000.00]

NL: 2.55E3

CGDF#311-334 RT: 5.41-5.78 AV: 12 F: ITMS - c  
ESI Full ms [100.00-2000.00]

Fig. 3
